# Supplementary material for: ICON coupled to HAM-lite 1.0 in limited-area mode: an efficient framework for targeted kilometer-scale simulations with interactive aerosols
Source: Copernicus journal article supplement (doi:10.5194/egusphere-2026-328), 2026-02-10
Supplement: Supplementary file [file egusphere-2026-328-AC1-supplement.pdf]

## Authors' Response to Reviewers' Comments

Manuscript No.: egusphere-2026-328, submitted to GMD

Title: ICON coupled to HAM-lite 1.0 in limited-area mode: an efficient framework for targeted kilometer-scale simulations with interactive aerosols

Authors: Bernd Heinold, Philipp Weiss, Sadhitro De, Anne Kubin, Jason Müller, Fabian Senf, Philip Stier, and Ina Tegen

*We would like to thank the anonymous reviewer for her/his time and constructive comments, and hope that we have responded satisfactorily to all the points raised.*

### Anonymous Referee #1

Received and published: 7 Apr 2026

The manuscript describes the first application of the HAM-lite aerosol microphysics model coupled to ICON in a limited area mode for computationally efficient high-resolution simulations on a regional scale. The model results are evaluated against various observations for three different regional case studies.

The paper is a relevant contribution to the field of scientific modelling and is well suited for GMD. It presents novel development and model applications of aerosol modelling on the regional scale that can serve as a basis for future studies with this model system. The methods and model description are well documented and the conclusions are well supported by the presented results. The manuscript is very well written and organized and there are, in my opinion, only a few issues that should be addressed or clarified.

### General comments:

Please provide some representative quantitative metrics to describe the model's ability and performance when comparing against observations. The authors often mention a "good agreement" between model results and observations. While this is surely the case from looking at the respective comparisons, it should be underlined by providing some quantitative metrics (e.g. standard deviation, correlation coefficient, etc., see specific comments below). Maybe some representative numbers on the model performance could also be added to the abstract.

*Many thanks for this valuable suggestion. We have added quantitative evaluation metrics to the corresponding figure panels, including the correlation coefficient ( $R$ ), root mean square error (RMS), normalized RMS error (nRMS), bias, normalized bias, and the ratio between simulated and observed standard deviation ( $\sigma_{mod}/\sigma_{obs}$ ). These metrics are now also briefly discussed in the revised manuscript to support the interpretation of the model performance. However, because the manuscript evaluates model performance across three distinct case studies and aerosol regimes with varying statistical behaviour, we consider a qualitative summary more appropriate for the abstract. Instead, we summarize the overall model performance and key systematic biases qualitatively, while the detailed quantitative evaluation metrics are provided and described in the main text and figures (new Tab. 3, Figs. 3 and 5; please also see the responses below).*

## Specific comments:

- Line 37: "... HAM-lite needs only one prognostic variable for each mode ...". It could be stated already here that this is the number concentration.

*Thank you for this helpful suggestion. We have clarified the text by explicitly stating at this point already that the prognostic variable in HAM-lite is the aerosol number concentration of the respective mode.*

- Table 1 provides not much information by itself and could potentially be combined with Table 2.

*Agreed. In the revised version of the manuscript, we have removed the original Table 1 and instead incorporated the information on aerosol size ranges into Table 2 (now Table 1), which now provides a comprehensive overview of the selected aerosol modes, including their size ranges, compositions and physical properties.*

- Section 2.5.1 "Model configuration":

- Line 191: Please also provide the resolution of the global ICON grid.

*We thank the reviewer for the comment. To avoid possible confusion with ICON configurations employing global grids plus regional refinement, we clarified in the revised manuscript that all simulations are performed exclusively in limited-area mode using the R2B10 grid.*

- Lines 205f: Please provide the information on how the different emissions are attributed to the respective aerosol modes (or refer again to the previous publication of Weiss et al., 2025)

*Many thanks for spotting this gap in the information. We added a brief clarification describing how anthropogenic emissions are assigned to aerosol modes in HAM-lite. Similar to Weiss et al. (2025), anthropogenic emissions are attributed to the internally mixed carbonaceous and sulfuric modes according to the prescribed modal composition. In contrast to Weiss et al. (2025), the anthropogenic and wildfire emission were taken from CEDS and GFAS instead of ACCMIP. The different mass fluxes lead to slightly different volume fractions (cf. Eqs. 5-7 in Weiss et al., 2025).*

- Section 2.6 "Computational performance": Could you compare the computational cost of an ICON-HAM-lite LAM simulation with that of an ICON-HAM LAM? This would highlight the necessity for the simplified scheme regarding the aspect of computational efficiency also for the case of regional model simulations.

*We strongly agree that a direct comparison between a limited-area configuration of ICON-HAM-lite and the full ICON-HAM (M7 version) would be highly valuable for quantifying the computational benefit of the simplified aerosol scheme. However, a LAM configuration of the ICON model coupled to the full HAM is currently still under development and therefore not yet available for a consistent benchmark comparison.*

*For this reason, we are presently unable to provide a reliable estimate of the computational differences. Nevertheless, the reduction in computational cost is expected to be substantial, as HAM-lite requires only five aerosol tracers compared to 25 aerosol tracers in the full HAM-M7 configuration. Since tracer transport and associated aerosol processes represent a major contribution to the computational costs of aerosol-climate simulations, this reduction in prognostic variables is one of the key design features of HAM-lite.*

- Section 4.1 “PM2.5 pollution over Germany”:
  - The observed PM2.5 values may also contain a contribution from e.g. NH<sub>4</sub> and NO<sub>3</sub> aerosol species, which are, however, not represented in the HAM-lite aerosol mode structure used here. The authors should discuss this bias in more detail. Is it possible to estimate the contribution of these missing aerosol components for the station comparisons, e.g. from a simulation with the full aerosol scheme HAM or from the observations itself?

*We agree that the absence of secondary inorganic aerosol species such as ammonium and nitrate likely contributes to the underestimation of PM2.5 concentrations, particularly at rural background stations and during pollution episodes influenced by long-range transport. However, a quantitative estimate of this missing contribution is difficult within the scope of the present study. The limited-area configuration of the full ICON–HAM model, including interactive aerosol microphysics and chemistry, is currently still under development and therefore not yet available for direct comparison simulations (see previous reply). In addition, the contribution of nitrate and ammonium aerosols is highly variable in space and time due to their strong dependence on temperature, humidity, and gas–particle partitioning processes. We have therefore chosen not to apply a simple offset correction to the model results. Instead, we expanded the discussion in the revised manuscript to clarify that missing secondary inorganic aerosol formation likely contributes to the systematic PM2.5 biases identified in the station comparisons.*

- The authors should add some quantitative metrics to Fig. 3 and to the text, e.g. standard deviation, correlation coefficient, etc. An overall metric considering all German stations (Fig. 2) would also help to address the model performance in this case study.

*As mentioned above, we have added quantitative evaluation metrics to the corresponding panels in Fig. 3. This includes the correlation coefficient ( $R$ ), root mean square error (RMS), normalized RMS error (nRMS), bias, normalized bias, and the ratio between simulated and observed standard deviation ( $\sigma_{\text{mod}}/\sigma_{\text{obs}}$ ). The metrics are used to support the evaluation of the model performance in the respective sections of the text. In addition, those metrics were also calculated for the German stations shown in Fig. 2. However, rather than providing a single aggregated metric over all stations, which would combine substantially different aerosol regimes and station environments, we evaluated the model performance separately for background and industrial stations. Mean*

*statistical metrics for both station classes, have been included in an additional table in the revised manuscript. This separation provides a more meaningful assessment of the model performance across different observational environments.*

- Section 4.2 “Sea salt aerosol in the Atlantic Arctic”:
  - Why is this evaluation performed on a daily-mean basis (i.e. with a lower temporal resolution than in the previous section)?

*Whilst measurements taken aboard the RV Polarstern are available at a higher temporal resolution of 90 seconds, only daily values are available for the EMEP stations shown. We have therefore decided to use the daily mean consistently for the comparison.*

- Again, the evaluation would benefit from additional quantitative metrics in Fig. 5 and in the text.

*Quantitative evaluation metrics have also been added to Fig. 5 and the corresponding text description. During this revision, we also noticed that the original submission inadvertently included an outdated version of Fig. 5. The figure and the corresponding discussion in the text have therefore been updated using the final model dataset. The overall interpretation and conclusions remain unchanged.*

#### **Technical corrections:**

- Line 79: Add “geometric” in front of “standard deviation”

*Done.*

- Line 158: Typo “... properties properties ...”

*Corrected.*

- Line 216: Typo “... kW,m-2”

*Corrected.*
